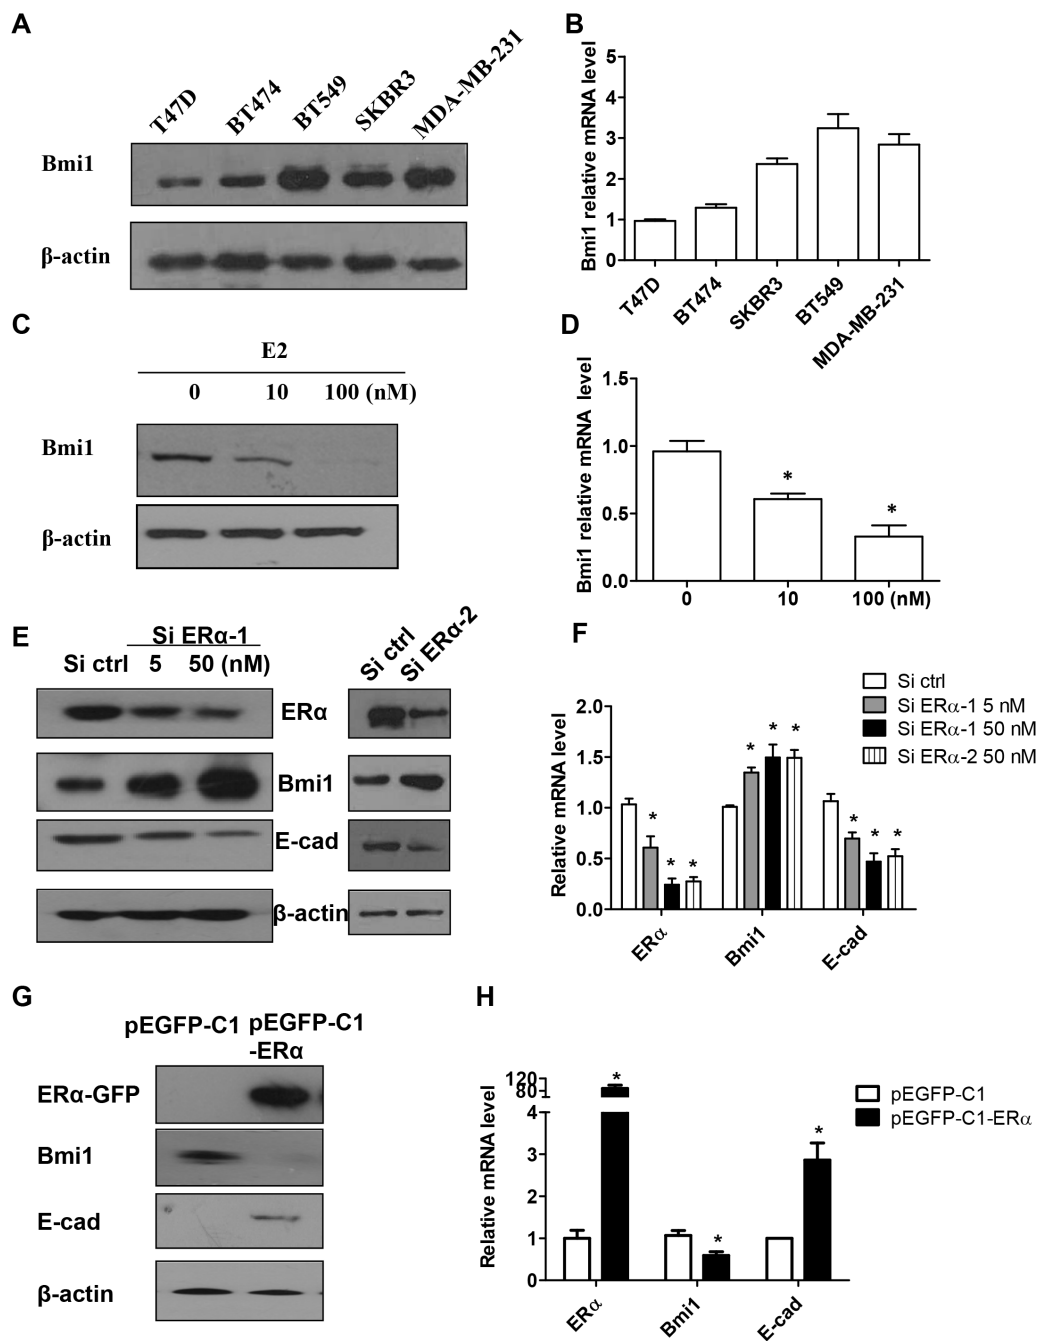

**Figure 1: E2 and ER $\alpha$  downregulates Bmi1 expression and increases E-cadherin expression in breast cancer cells.** A–B. Western blot (A) and quantitative real-time RT-PCR analysis (B) of protein and mRNA expression of Bmi1 in ER $\alpha$ -positive T47D and BT474 cells, and ER $\alpha$ -negative breast cancer cells (SKBR3, BT549 and MDA-MB-231). C–D. T47D cells were maintained in phenol red-free DMEM with 10% dextran-coated charcoal-treated FBS for 48 h, and cells then treated with either ethanol vehicle or E2 (10 or 100 nM) for 72 h. Cells were harvested and analyzed for Bmi1 mRNA and protein levels. Data are mean  $\pm$  SEM ( $n = 3$ ). \* $P < 0.05$  compared with ethanol vehicle (Student's  $t$  test). E–F. Western blot (E) and quantitative RT-PCR analysis (F) of protein and mRNA levels in T47D cells transfected with control siRNA, ER $\alpha$  siRNA-1 (5 and 50 nM) or ER $\alpha$  siRNA-2 (50 nM). G–H. ER $\alpha$ , Bmi1 and E-cadherin protein and mRNA levels in BT549 cells stably transfected with the indicated vectors. Protein expression was normalized to  $\beta$ -actin mRNA. \* $P < 0.05$  compared with control cells (Student's  $t$  test).

site, but not the region between positions –1184 to –1023, which did not contain the ERE/half-ERE binding site (Figure 2B).

Electrophoretic mobility shift assay (EMSA) revealed an ER $\alpha$ -binding band after the incubation of nuclear extracts from BT549 cells overexpressing ER $\alpha$











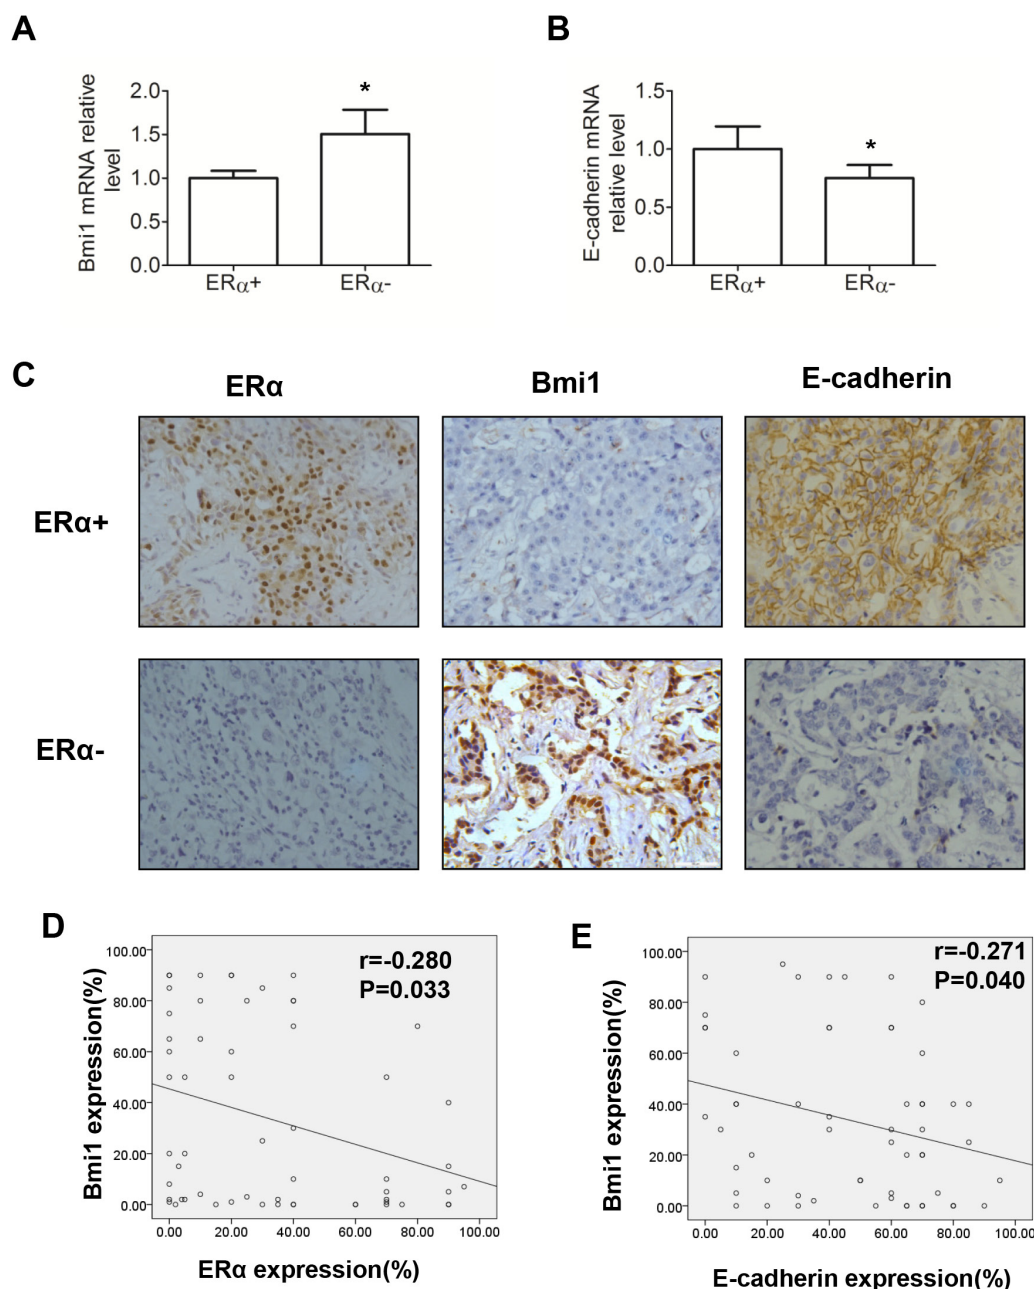

**Figure 6: Association of Bmi1 and E-cadherin expression in 58 human breast cancer tissues.** A, B. Relative mRNA levels of Bmi1 (A) and E-cadherin (B) with ER $\alpha$ -negative and ER $\alpha$ -positive expression in breast cancer tissues. \* $P < 0.05$  (Student's  $t$  test). C. Representative fields of positive ER $\alpha$ , negative Bmi1 and positive E-cadherin (upper row) and negative ER $\alpha$ , positive Bmi1, and negative E-cadherin (lower row). Magnification, 400 $\times$  (C) D. Scatter plot of Bmi1 and ER $\alpha$  positive, immunohistochemically stained percentages of cells in human breast cancer tissues. E. Scatter plot of Bmi1 and E-cadherin positive, immunohistochemically stained percentages of cells in human breast cancer tissues (Spearman's Rank Correlation Test).

E-cadherin expression and EMT [2, 7]. Interestingly, the *Bmi1* promoter sequence includes a half-site ERE element (TGACC). Evidence that ER $\alpha$  directly binds to the TGACC site in the *Bmi1* promoter suggests that ER $\alpha$ -mediated Bmi1 suppression is indeed regulated at the transcriptional level. This conclusion is further supported by our dual luciferase reporter gene assay revealing increased/decreased activity of a *Bmi1* promoter-driven

reporter gene in ER $\alpha$  silenced/overexpressing breast cancer cells. Our findings indicate that ER $\alpha$  suppresses Bmi1 expression by directly binding to the half-ERE site of the *Bmi1* promoter, thereby demonstrating a novel pathway by which ER $\alpha$  suppresses migration, invasion, and EMT in breast cancer cells, in addition to modulating Slug [2, 7] and NF- $\kappa$ B [6] pathways. Interestingly, a recent article by Wang *et al.* reported that ER $\alpha$  bound









31. Wong AS, Gumbiner BM. Adhesion-independent mechanism for suppression of tumor cell invasion by E-cadherin. *The Journal of cell biology*. 2003; 161:1191–1203.
32. Guo BH, Feng Y, Zhang R, Xu LH, Li MZ, Kung HF, Song LB, Zeng MS. Bmi-1 promotes invasion and metastasis, and its elevated expression is correlated with an advanced stage of breast cancer. *Molecular cancer*. 2011; 10:10.
33. Beato M, Herrlich P, Schutz G. Steroid hormone receptors: many actors in search of a plot. *Cell*. 1995; 83:851–857.
34. Petz LN, Nardulli AM. Sp1 binding sites and an estrogen response element half-site are involved in regulation of the human progesterone receptor A promoter. *Molecular endocrinology*. 2000; 14:972–985.
35. Wang H, Liu H, Li X, Zhao J, Zhang H, Mao J, Zou Y, Zhang H, Zhang S, Hou W, Hou L, McNutt MA, Zhang B. Estrogen receptor alpha-coupled Bmi1 regulation pathway in breast cancer and its clinical implications. *BMC cancer*. 2014; 14:122.
36. Zhang D, Xie X, Chen Y, Hammock BD, Kong W, Zhu Y. Homocysteine upregulates soluble epoxide hydrolase in vascular endothelium *in vitro* and *in vivo*. *Circulation research*. 2012; 110:808–817.
37. Yang MH, Chang SY, Chiou SH, Liu CJ, Chi CW, Chen PM, Teng SC, Wu KJ. Overexpression of NBS1 induces epithelial-mesenchymal transition and co-expression of NBS1 and Snail predicts metastasis of head and neck cancer. *Oncogene*. 2007; 26:1459–1467.
